**CORRECTION**

# Molt regulation in green and red color morphs of the crab *Carcinus maenas*: gene expression of molt-inhibiting hormone signaling components

Ali M. Abuhagr, Jennifer L. Blindert, Sukkrit Nimitkul, Ian A. Zander, Stefan M. LaBere, Sharon A. Chang, Kyle S. MacLea, Ernest S. Chang and Donald L. Mykles

There was an error published in *J. Exp. Biol.* **217**, pp. 796-808.

In Fig. 3, the letters and numbers indicating which means were significantly different are missing from panel A. The correct figure is printed below.

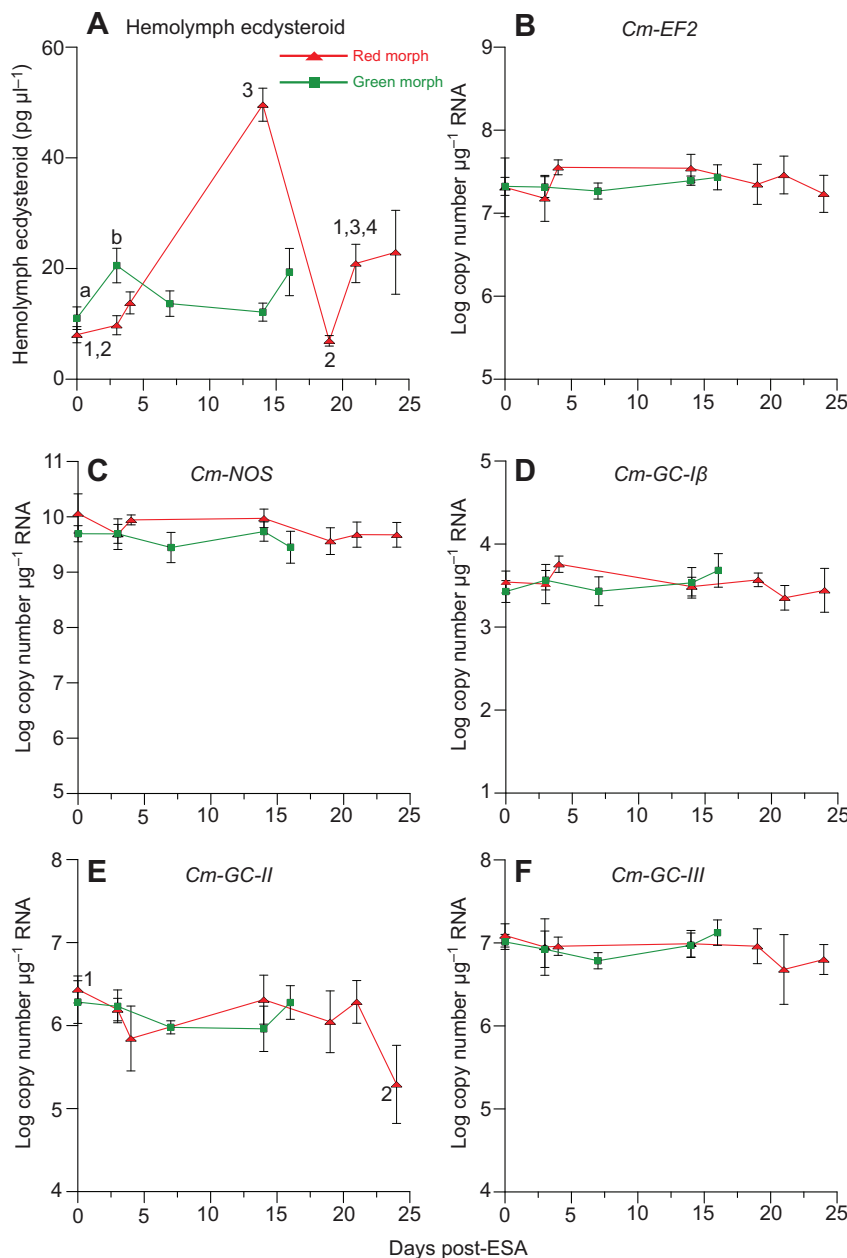

**Fig. 3. Effects of eyestalk ablation (ESA) on hemolymph ecdysteroid, nitric oxide synthase (NOS) and guanylyl cyclase expression in red (triangles) and green (squares) morphs over 24 and 16 days, respectively.** Animals were eyestalk-ablated at Day 0. YOYs were harvested and hemolymph samples were taken at various intervals post-ESA. Ecdysteroid levels were quantified by ELISA. mRNA levels were quantified by qPCR. Data are presented as means ± 1 s.e.m. (red morph, N=7, 3, 6 and 3 at Days 0, 3, 14 and 24, respectively; green morph, N=13, 5, 5, 5 and 4 at Days 0, 3, 7, 14 and 16, respectively). Different letters (numbers) indicate green (red) morphs that are significantly different ( $P < 0.05$ ) from each other.

We apologise to the authors and readers for this omission.
